# Supplementary material for: Mechanism of alkane H/D exchange over zeolite H-ZSM-5 at low temperature: a combined computational and experimental study
Source: Royal Society of Chemistry journal article supplement (doi:10.1039/c6cy00467a), 2016-01-01
Supplement: c6cy00467a1.pdf [file c6cy00467a1.pdf]

Supporting information for

**Mechanism of Alkane H/D exchange over Zeolite H-ZSM-5 at  
Low Temperature: A Combined Computational and  
Experimental Study**

Yueying Chu<sup>a</sup>, Nianhua Xue<sup>b</sup>, Bolian Xu<sup>b</sup>, Ding Qian<sup>c,d</sup>, Zhaochi Feng<sup>c</sup>

Anmin Zheng<sup>a,\*</sup>, Feng Deng<sup>a,\*</sup>

<sup>a</sup> State Key Laboratory of Magnetic Resonance and Atomic and Molecular Physics, National Center for Magnetic Resonance in Wuhan, Wuhan Institute of Physics and Mathematics, Chinese Academy of Sciences, Wuhan 430071, China.

<sup>b</sup> Key Laboratory of Mesoscopic Chemistry, the School of Chemistry and Chemical Engineering, Nanjing University, Nanjing 210093, China

<sup>c</sup> State Key Laboratory of Catalysis, Dalian Institute of Chemical Physics, Chinese Academy of Sciences, Dalian 116023, China

<sup>d</sup> Graduate University of Chinese Academy of Sciences, China Graduate University of Chinese Academy of Sciences, China

**Table S1.** The adsorption energy and intrinsic activation barriers (kcal/mol) of isobutane direct H/D exchange over 72T H-ZSM-5 zeolite model with different number of active site atoms treated as high level (See Figure S1) .<sup>a</sup>

|                                                | $E_{ads}$ | $E_{act}$ |
|------------------------------------------------|-----------|-----------|
| 2T ( $O_3Si-OH-AlO_3$ )                        | -10.9     | 32.5      |
| 8T ( $(SiO)_3Si-OH-Al(OSi)_3$ )                | -11.1     | 31.8      |
| 12T ( $(SiO)_2(SiO)_3Si-OH-Al(OSi)_3(SiO)_2$ ) | -11.2     | 31.8      |

<sup>a</sup> The structure optimizations are performed on the level of ONIOM(m062x/6-31g(d,p):mndo) with the high level atoms relaxing. Based on the optimized structures, the adsorption energy and intrinsic activation barrier are calculated on the level of m062x/6-31g(d,p).

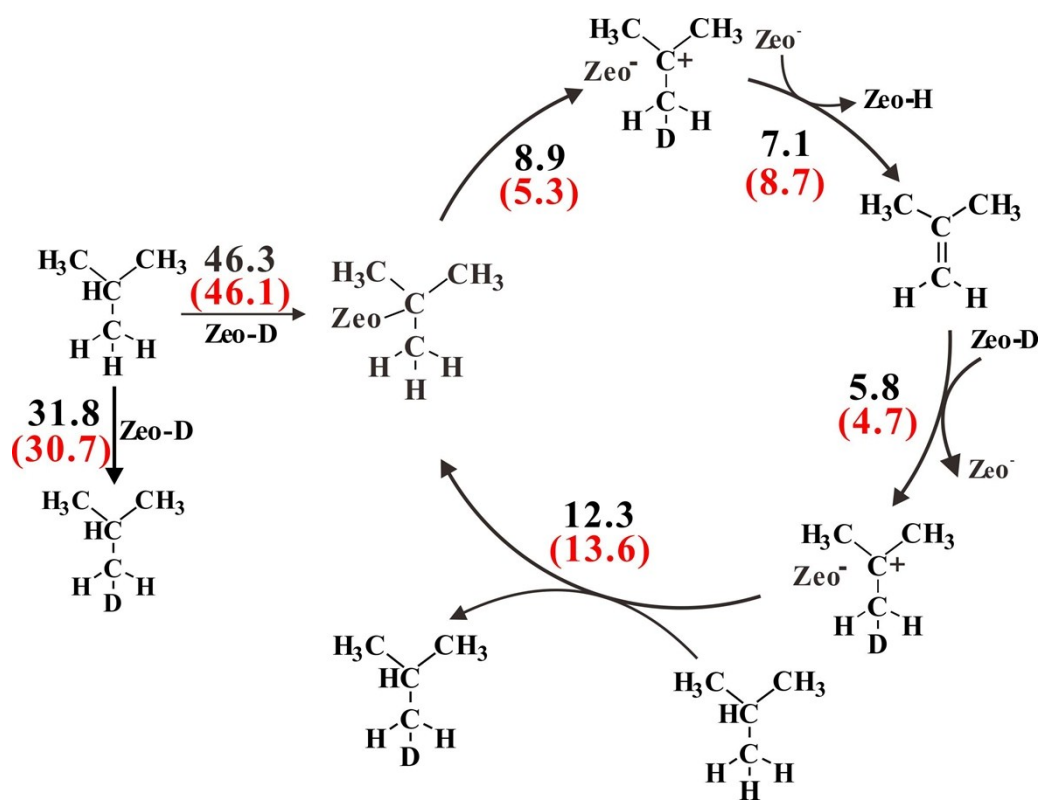

**Scheme S1.** The activation energy of isobutane H/D exchange in HZSM-5 zeolite at M062X/6-31g(d,p) (in black) and  $\omega$ B97dx/6-31g(d,p) (in bracket) theoretical levels.

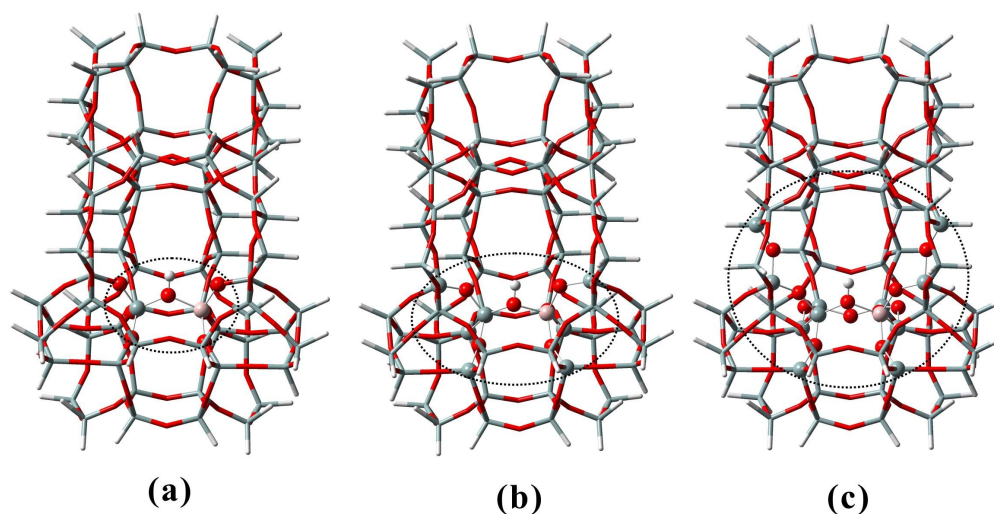

**Figure S1** Representation of H-ZSM-5 zeolite by 72T model. The 2T (a), 8T (b) and 12T (c) cluster in the extended cluster models represented as ball and stick view was treated as high-layer atoms during the ONIOM calculations.

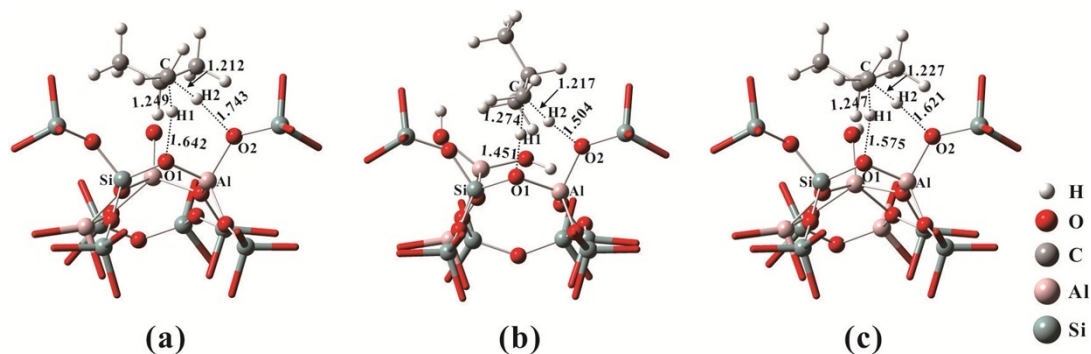

**Figure S2.** Optimized geometries of transition states (TS) for isobutane direct H/D exchange over EFAL-H-ZSM-5 zeolite with the accessible EFAL species (a)  $\text{AO}^+$ , (b)  $\text{Al}(\text{OH})_2^+$  and (c)  $\text{AlOH}_2^+$ . Selected interatomic distances (in Å) are indicated.
